# Supplementary material for: Photochemical sensitivity to emissions and local meteorology in Bogotá, Santiago, and São Paulo
Source: Oxford University Press journal article supplement (doi:10.1525/elementa.2021.00044), 2022-01-01
Supplement: supplementary_material.docx [file supplementary_material.docx]

**Supplemental Material**

**Photochemical sensitivity to emissions and local meteorology in Bogotá, Santiago, and São Paulo: An analysis of the initial COVID-19 lockdowns**

Rodrigo J. Seguel 1, 2, Laura Gallardo 1, 2, Mauricio Osses 1, 3, Néstor Y. Rojas 4, Thiago Nogueira 5, Camilo Menares 1, 2, Maria de Fatima Andrade 5, Luis C. Belalcázar 4, Paula Carrasco 2, Henk Eskes 6, Zoë L. Fleming 1, 7, Nicolas Huneeus 1, 2, Sergio Ibarra-Espinosa 5, Eduardo Landulfo 8, Manuel Leiva 9, Sonia C. Mangones 10, Fernando G. Morais 8, Gregori A. Moreira 11, Nicolás Pantoja 3, Santiago Parraguez 1, 12, Jhojan P. Rojas 13, Roberto Rondanelli 1, 2, Izabel da Silva Andrade 8, Richard Toro 9, Alexandre C. Yoshida 8, 14

Corresponding author: Rodrigo J. Seguel ([rodrigoseguel@uchile.cl](mailto:rodrigoseguel@uchile.cl)); ORCID ID: 0000-0003-4641-5618); Phone: 56229771068; Blanco Encalada 2002, CP: 8370449, Santiago, Chile

1 Center for Climate and Resilience Research (CR)2, Santiago, Chile

2 Department of Geophysics, Faculty of Physical and Mathematical Sciences, University of Chile, Santiago, Chile

3 Departamento Ingeniería Mecánica, Universidad Técnica Federico Santa María (UTFSM), Santiago, Chile

4 Department of Chemical and Environmental Engineering, Universidad Nacional de Colombia, Bogotá, Colombia

5 Departamento de Ciências Atmosféricas, Instituto de Astronomia, Geofísica e Ciências Atmosféricas, Universidade de São Paulo, Brazil

6 Royal Netherlands Meteorological Institute (KNMI)

7 Envirohealth Dynamics lab, C+ Research Center in Technologies for Society, School of Engineering, Universidad Del Desarrollo, Santiago, Chile

8 Institute for Energy and Nuclear Research, São Paulo, Brazil

9 Department of Chemistry, Faculty of Science, University of Chile

10 Department of Civil and Agricultural Engineering, Universidad Nacional de Colombia, Bogotá, Colombia

11 Federal Institute of São Paulo

12 Department of Mechanical Engineering, Faculty of Physical and Mathematical Sciences, University of Chile, Santiago, Chile

13 National Meteorology and Hydrology Service (SENAMHI), Lima, Peru

14 Instituto de Física da Universidade de São Paulo, São Paulo, Brasil Instituto de Ciências Exatas e Naturais do Pontal, Universidade Federal de Uberlândia, Ituiutaba, MG, Brasil

**List of Contents**

Physical interpretation of NO2 GAM. (Page 13)

References. (Page 16)

**Figure S-1**. NOx vehicle emissions in Bogotá at three different hours. The top panels show the base scenario, the middle panels correspond to the lockdown scenario, and the bottom panels correspond to the difference in lockdown-base emissions. (Page 6)

**Figure S-2**. VOC vehicle emissions in Santiago at three different hours. The top panels show the base scenario, the middle panels correspond to the lockdown scenario, and the bottom panels correspond to the difference in lockdown-base emissions. (Page 7)

**Figure S-3**. Secondary aerosol fraction of PM2.5 in Bogotá (top panels), Santiago (middle panels) and São Paulo (bottom panels) for the base (left column), lockdown (middle column), and the difference (lockdown - base; right column). Gray dots indicate unavailable results. (Page 9)

**Figure S-4**. (a) Daylight cycle of the aerosol optical thickness (AOD) between 20 March and 3 April, 2020 (lockdown) and an equivalent period for the years 2015 and 2019 (base scenario) at Central Santiago. (b) Daylight cycle of the Ångström Exponent for the lockdown and base scenario. (c) AOD daylight cycle between 24 March and 15 April 2020 (lockdown) and equivalent period for the years 2015 and 2019 (base scenario) at São Paulo. (d) Daylight cycle of the Ångström Exponent for the lockdown and base scenario. (Page 10)

**Figure S-5**. Characterization of aerosol sources according Gharibzadeh et al. 2018. Left panel shows the base scenerio (gray dots) and March 2020 without lockdown (blue dots). Right panel shows the base scenerio (gray dots) and March 2020 under lockdown. (Page 11)

**Figure S-6**. Characterization of aerosol sources according Gharibzadeh et al. 2018. Blue dots show the lockdown scenario (24 March-15 April 2020), and gray dots show the base scenario (equivalent period between the years 2015 and 2019). (Page 12)

**Figure S-7**.Partial dependence plots for NO2 GAM for Bogotá, Santiago, and São Paulo. Variables are daily maximum temperature (T), solar radiation (rad), specific humidity (q), wind speed (ws), and day of the week, and Julian day (JD). (Page 14)

**Figure S-8**. Observed (red line) and GAM fitted (black line) MDA8 for Bogotá (upper panels), Santiago (middle panels), and São Paulo (lower panels) for the base period (2015-2019) in the left panels, and the lockdown in 2020 in the right panels. In the left panels, the vertical gray lines indicate the change of the year. In the right panels, the gray shading corresponds to the confidence interval of the GAM model and the reddish shading to the variation of the observations (percentile 0.01 and 0.99). (Page 15)

**Table S-1**. Traffic counts and data sources used for Bogotá, Santiago and São Paulo. (Page 4)

**Table S-2**. Characteristics of air quality monitoring stations. Each station provides data with hourly time resolution. (Page 5)

**Table S-3**. Changes in median TROPOMI NO2 (µmol/m2) columns over Bogotá, Santiago, and São Paulo every 15 days, and over the lockdown periods in 2020, and reference period in 2019. The cloud filtering parameter (qa) was reduced to 0.5 over Bogotá and São Paulo for the 15-day periods, not so for the lockdown periods. Over Santiago, we kept qa>0.75 in all periods. The polygons over which these statistics were computed are shown in Figure 4. (Page 8)

**Table S-1**. Traffic counts and data sources used for Bogotá, Santiago and São Paulo.

| Data source | Information provided |
| --- | --- |
| Transportation Authority of Bogotá (SDM) | Origin-destination travel surveys for the year 2015.  Vehicle and passenger counts for 49-road intersections.  Evaluation of commuting time for different socio-demographic segments of the population and empirically calibrated speed-flow equations. The traffic assignment method used is stochastic user equilibrium based on travel times derived from speed-flow curves. |
| Ministry of Transport and Telecommunications of the Chilean Government | 24-hour automatic counting stations controlled by the Operational Transit Control Unit (UOCT, <https://mtt.gob.cl/pyd/uoct>) and the 2012 origin-destination survey (SECTRA, <http://www.sectra.gob.cl/>). |
| Traffic Engineering Company (CET).  São Paulo Transport (SPTRANS) | Traffic flows of light vehicles and trucks (CET).  Public transportation traffic flow (SPTRANS).  Both datasets come from travel-demand models for morning rush hour based on the origin-destination survey, provided by the public company Metro (<http://www.metro.sp.gov.br/>). |

**Table S-2**. Characteristics of air quality monitoring stations. Each station provides data with hourly time resolution.

| **City** | **Data provider** | **Site** | **Characteristics** |
| --- | --- | --- | --- |
| Bogotá | *Secretaría Distrital de Ambiente:* <http://201.245.192.252:81/> | Carvajal – Sevillana | Low–income residential and industrial area, close to avenue with high traffic of light and heavy vehicles (Autosur). |
| Centro de Alto Rendimiento – CDAR | Sports campus surrounded by a park in middle–income residential area. Medium traffic of light vehicles and buses. |
| Guaymaral | University campus, surrounded by schools, cemeteries and shopping malls, near an avenue with high traffic of light and heavy vehicles (Autonorte). |
| Tunal | Low–income residential area. |
| Santiago | Ministry of the Environment: <https://sinca.mma.gob.cl> | Cerro Navia | Low–income residential area. |
| El Bosque | Low–income residential area. |
| Independencia | Middle–income residential area. |
| La Florida | Middle–income residential area. |
| Las Condes | High–income residential area. Located in a park. |
| Parque O'Higgins | Park in downtown Santiago, ~300 m to highway |
| Pudahuel | Low–income residential area. |
| Puente alto | Low–income residential area. |
| São Paulo | São Paulo State Environmental Protection Agency: <https://qualar.cetesb.sp.gov.br> | Congonhas | Commercial area with heavy traffic of light and diesel trucks. Close to the central airport of São Paulo |
| Ibirapuera | Park in a residential area, ~250 m from main avenues. |
| Ponte dos Remedios | Commercial area with heavy traffic of light and diesel trucks. Close to a busy expressway (Marginal Tietê). |
| Parque Dom Pedro | In the old downtown city, characterized by traffic of light and heavy-duty vehicles, including diesel buses. |
| Pinheiros | High–income residential area close to a busy expressway (Marginal Pinheiros). |


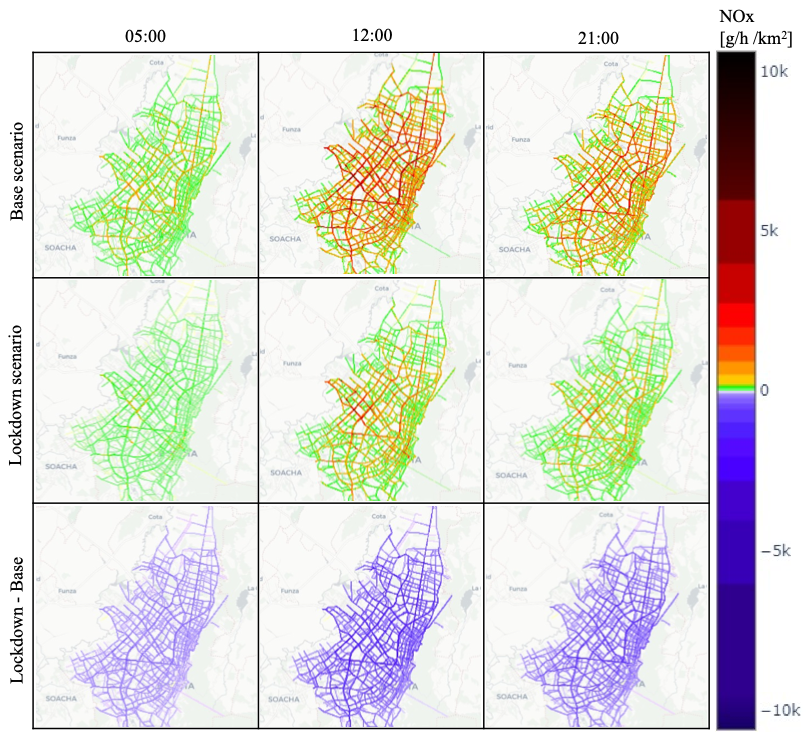


**Figure S-1**. NOx vehicle emissions in Bogotá at three different hours. The top panels show the base scenario, the middle panels correspond to the lockdown scenario, and the bottom panels correspond to the difference in lockdown-base emissions.

**
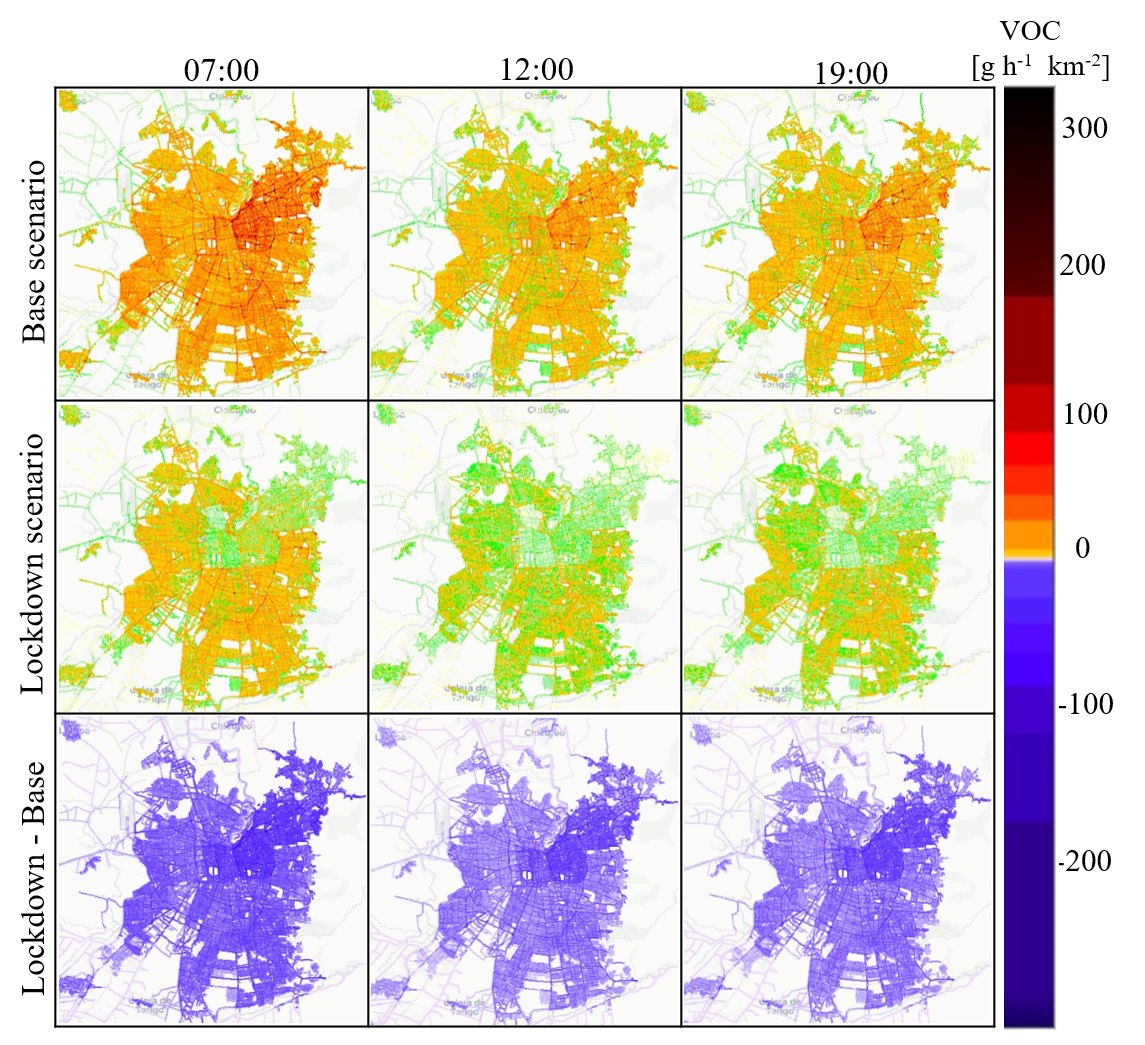
**

**Figure S-2**. VOC vehicle emissions in Santiago at three different hours. The top panels show the base scenario, the middle panels correspond to the lockdown scenario, and the bottom panels correspond to the difference in lockdown-base emissions.

**Table S-3**. Changes in median TROPOMI NO2 (µmol/m2) columns over Bogotá, Santiago, and São Paulo every 15 days, and over the lockdown periods in 2020, and reference period in 2019. The cloud filtering parameter (qa) was reduced to 0.5 over Bogotá and São Paulo for the 15-day periods, not so for the lockdown periods. Over Santiago, we kept qa>0.75 in all periods. The polygons over which these statistics were computed are shown in Figure 4.

| **Date** | **2019 (**µmol/m2**)** | **2020 (**µmol/m2**)** | **Difference (%)** |
| --- | --- | --- | --- |
| **Bogotá** | | | |
| 1-15 March | 45.2 | 36.7 | -19 |
| 16-31 March | 47.4 | 14.2 | -70 |
| 1-15 April | 32.6 | 16.9 | -48 |
| 16-30 April | 29.8 | 21.0 | -29 |
| 1-15 May | 28.8 | 28.2 | -2 |
| 16-31 May | 44.8 | 18.1 | -60 |
| **March 23-May 23** | **38.3** | **23.0** | **-40** |
| **Santiago** | | | |
| 1-15 March | 141.5 | 116.6 | -18 |
| 16-31 March | 189.5 | 105.3 | -44 |
| 1-15 April | 241.5 | 147.5 | -39 |
| 16-30 April | 252.4 | 168.8 | -33 |
| 1-15 May | 299.7 | 189.6 | -37 |
| 16-31 May | N/A | 159.6 | N/A |
| **26 March-14 May** | **221.9** | **144.2** | **-35** |
| **São Paulo** | | | |
| 1-15 March | 75.5 | 44.6 | -41 |
| 16-31 March | 47.1 | 50.3 | 7 |
| 1-15 April | 84.0 | 37.2 | -56 |
| 16-30 April | 88.1 | 56.8 | -36 |
| 1-15 May | 164.3 | 56.0 | -66 |
| 16-31 May | 154.8 | 74.1 | -52 |
| **24 March-23 May** | **99.8** | **53.1** | **-47%** |


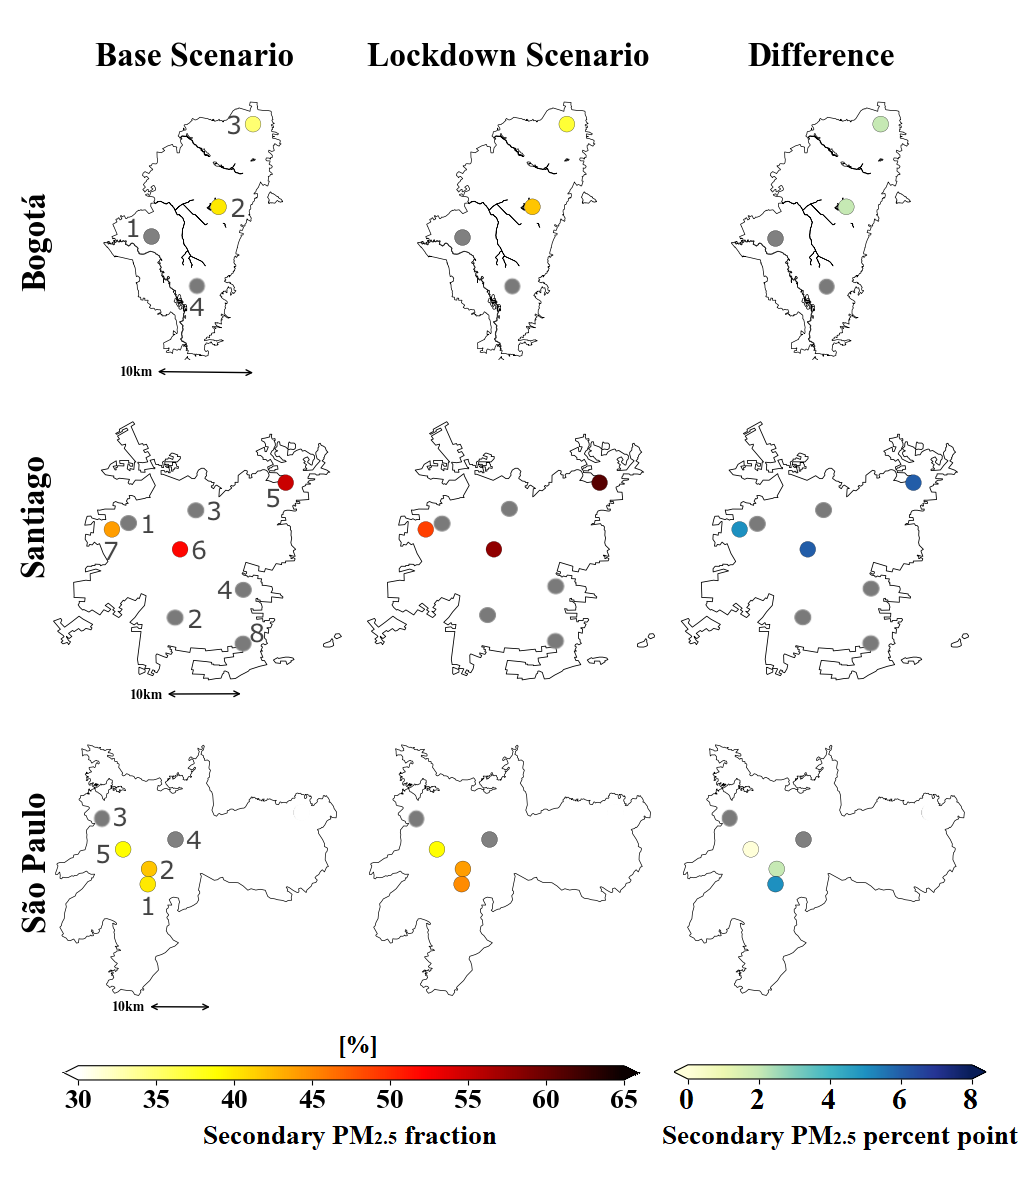


**Figure S-3**. Secondary aerosol fraction of PM2.5 in Bogotá (top panels), Santiago (middle panels) and São Paulo (bottom panels) for the base (left column), lockdown (middle column), and the difference (lockdown - base; right column). Gray dots indicate unavailable results. The Shapefile maps represent the urban areas, and the two-way arrows indicate the scale at 10 km for each city. Bogotá: (1) Carvajal – Sevillana, (2) Centro de Alto Rendimiento, (3) Guaymaral, (4) Tunal. Santiago: (1) Cerro Navia, (2) El Bosque, (3) Independencia, (4) La Florida, (5) Las Condes, (6) Parque O’Higgins, (7) Pudahuel, (8) Puente Alto. São Paulo: (1) Congonhas, (2) Ibirapuera, (3) Ponte dos Remedios, (4) Parque Dom Pedro, (5) Pinheiros.

**AOD at 500 nm & AE between 440 nm to 870 nm**


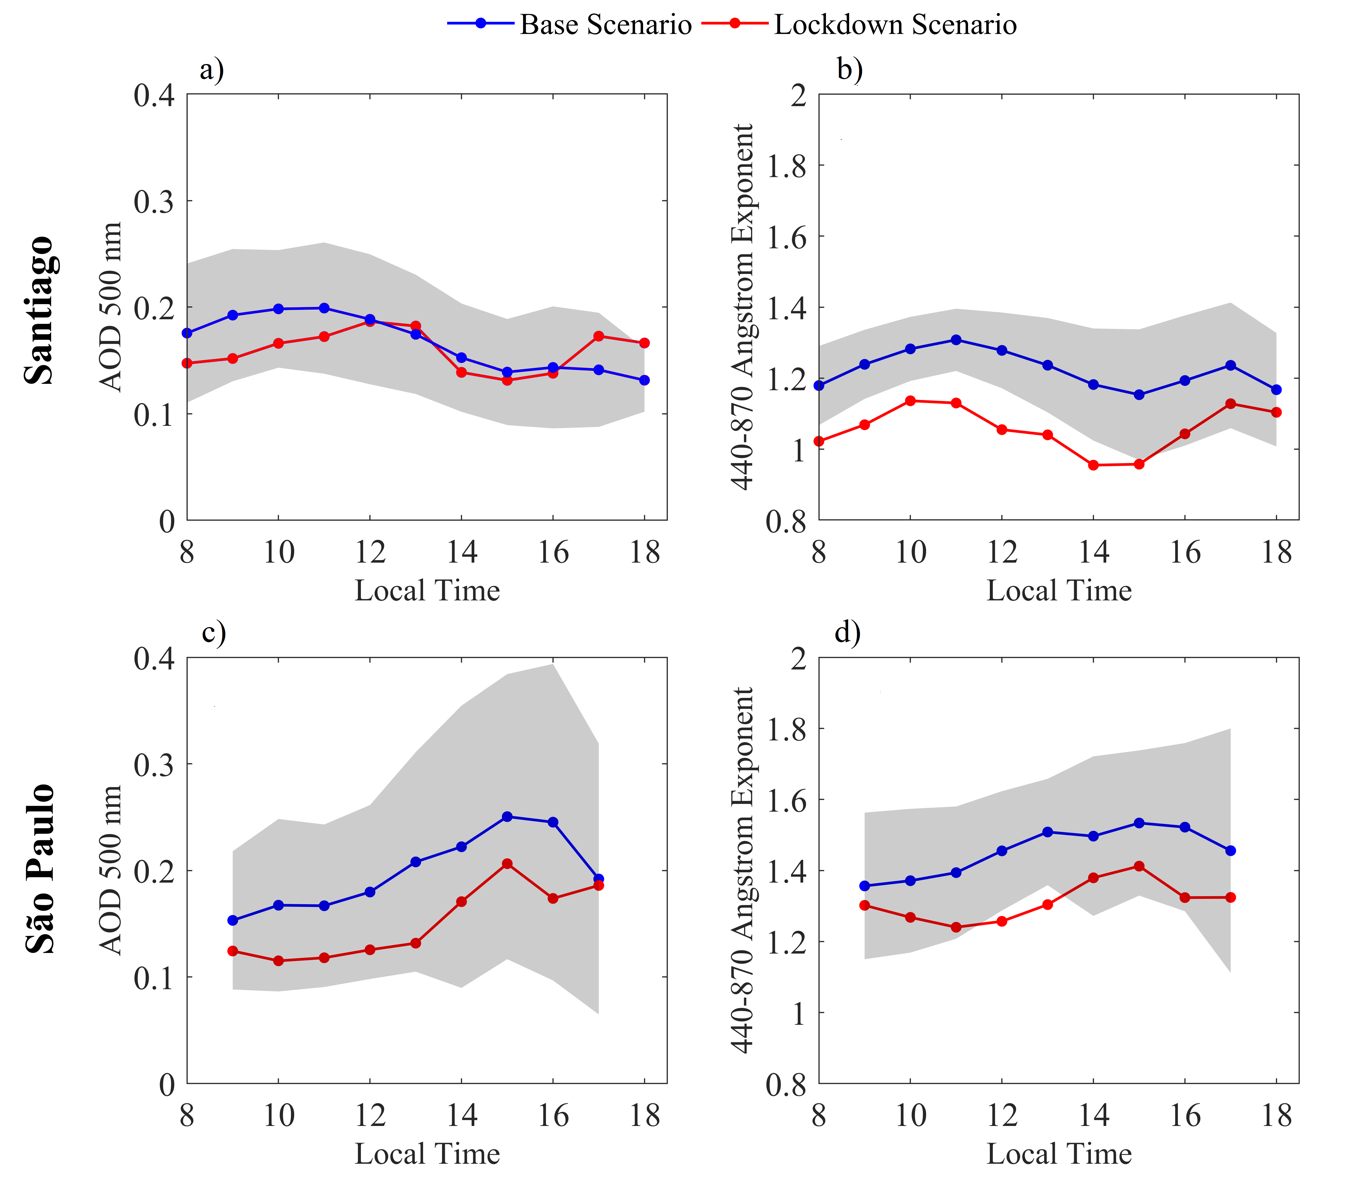


**Figure S-4**. (a) Daylight cycle of the aerosol optical thickness (AOD) between 20 March and 3 April, 2020 (lockdown) and an equivalent period for the years 2015 and 2019 (base scenario) at Central Santiago. (b) Daylight cycle of the Ångström Exponent for the lockdown and base scenario. (c) AOD daylight cycle between 24 March and 15 April 2020 (lockdown) and equivalent period for the years 2015 and 2019 (base scenario) at São Paulo. (d) Daylight cycle of the Ångström Exponent for the lockdown and base scenario.

Figure S-5 shows this dispersion diagram for days between 1-19 March and from 20 March to 3 April. In gray dots, data from previous years for the month of March. In the left panel of Figure S-5, we see a significant increase in AOD and AE during the period between 1 to 19 March 2020 without lockdown, with some aerosols in the category of coarse “dust”, a situation that is not observed in the rest of the historical series. During the lockdown period (20 March 20 to 3 April), a significant decrease in AE is observed especially with respect to the earlier March 2020 data as well as an apparent increase in the lower values as well.

**Figure S-5**. Characterization of aerosol sources according Gharibzadeh et al. 2018. Left panel shows the base scenerio (gray dots) and March 2020 without lockdown (blue dots). Right panel shows the base scenerio (gray dots) and March 2020 under lockdown.


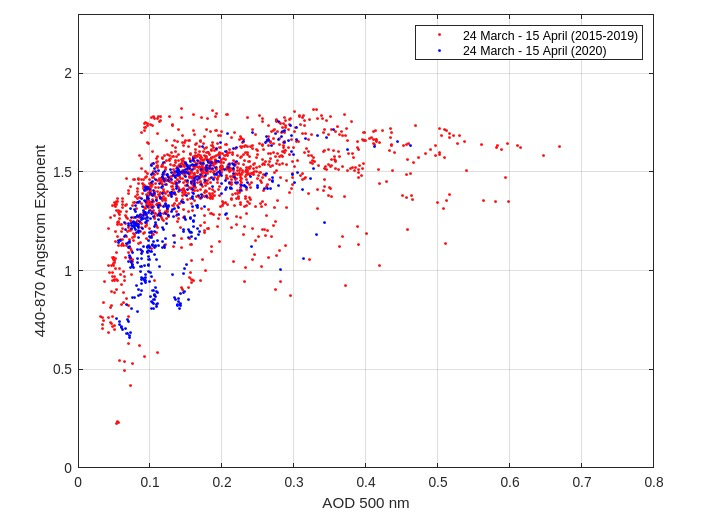


**Figure S-6**. Characterization of aerosol sources according Gharibzadeh et al. 2018. Blue dots show the lockdown scenario (24 March-15 April 2020), and gray dots show the base scenario (equivalent period between the years 2015 and 2019).

**Physical interpretation of NO2 GAM**

There is a linear positive dependence on daily maximum temperatures at Santiago and São Paulo, whereas in Bogotá it is rather flat. The behavior in Santiago and São Paulo is consistent with the secondary character of NO2. However, in the case of Bogotá higher temperatures are linked to more radiation and thus higher photolysis rate that may result in the flat curve.

Radiation has an inverse relation with NO2 that may be due to a more photolysis. Interestingly, the relation is inverse over the whole range of insolation. In Bogota, one finds a slight positive relation, perhaps indicative of more photochemistry. The dependence in Santiago is nonlinear with increasing NO2 for radiation below 350 W/m2 and decreasing NO2 thereafter. We interpret the former as an indication of incipient photochemical activity, and the latter as the effect of increased photolysis.

Like in the case of ozone, we find a slight linear and positive relationship between NO2 and humidity, which is difficult to interpret. In general, one would expect declining values of NO2 with increasing humidity as it is transformed to nitric acid or wet removed. This behavior is only found in São Paulo.

The dependence on maximum wind speed is quite different among the cities. In Bogotá, the relationship is weak but negative, although over nearly calm conditions. In Santiago, the relationship is nonlinear, with a negative dependence under nearly calm conditions, and a positive relationship above 2 m/s, which may be due to influx from upwind sources. In São Paulo, the relationship is nonlinear but clearly inverse suggesting dilution.

With respect to day-of-the week, all cities evidence accumulation up to Tuesday, then a plateau followed by a decline towards the weekend. This is suggestive of the so-called weekend effect; however, this is only apparent in ozone in Santiago and São Paulo, not so in Bogotá.

Finally, regarding seasonality (Julian day) dependence, we find a progressive increase in NO2 as the cold season approaches in Santiago and São Paulo. On the other hand, Bogotá evidences decreasing NO2 in connection with the warm season.

**Figure S-7**.Partial dependence plots for NO2 GAM for Bogotá, Santiago, and São Paulo. Variables are daily maximum temperature (T), solar radiation (rad), specific humidity (q), wind speed (ws), and day of the week, and Julian day (JD).

**
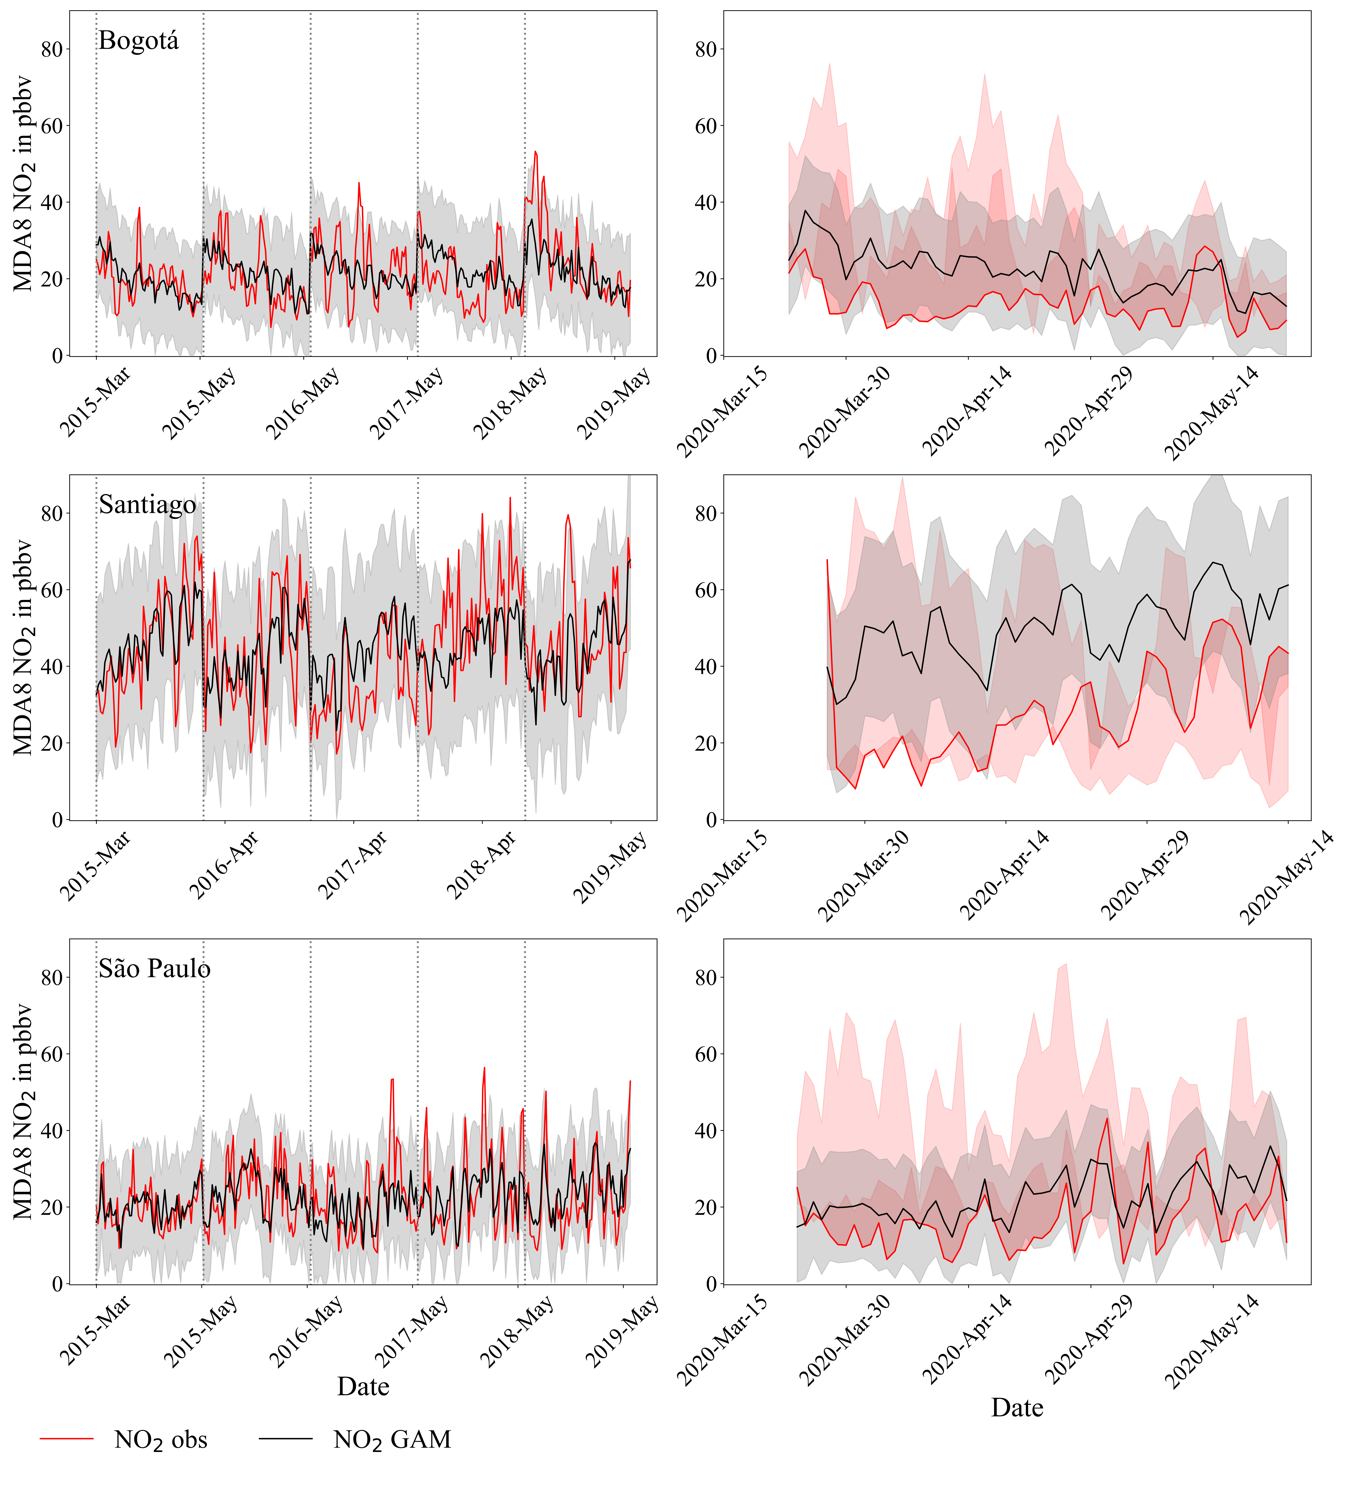
**

**Figure S-8**. Observed (red line) and GAM fitted (black line) MDA8 for Bogotá (upper panels), Santiago (middle panels), and São Paulo (lower panels) for the base period (2015-2019) in the left panels, and the lockdown in 2020 in the right panels. In the left panels, the vertical gray lines indicate the change of the year. In the right panels, the gray shading corresponds to the confidence interval of the GAM model and the reddish shading to the variation of the observations (percentile 0.01 and 0.99).

**References**

Gharibzadeh, M., Alam, K., Abedini, Y., Bidokhti, A. A., Masoumi, A., & Bibi, H. (2018). Characterization of aerosol optical properties using multiple clustering techniques over Zanjan, Iran, during 2010–2013. *Applied optics*, *57*(11), 2881-2889.
